# Supplementary material
Source: ML conference proceedings conference paper supplement (https://openreview.net/forum?id=7PORoDlSS4)

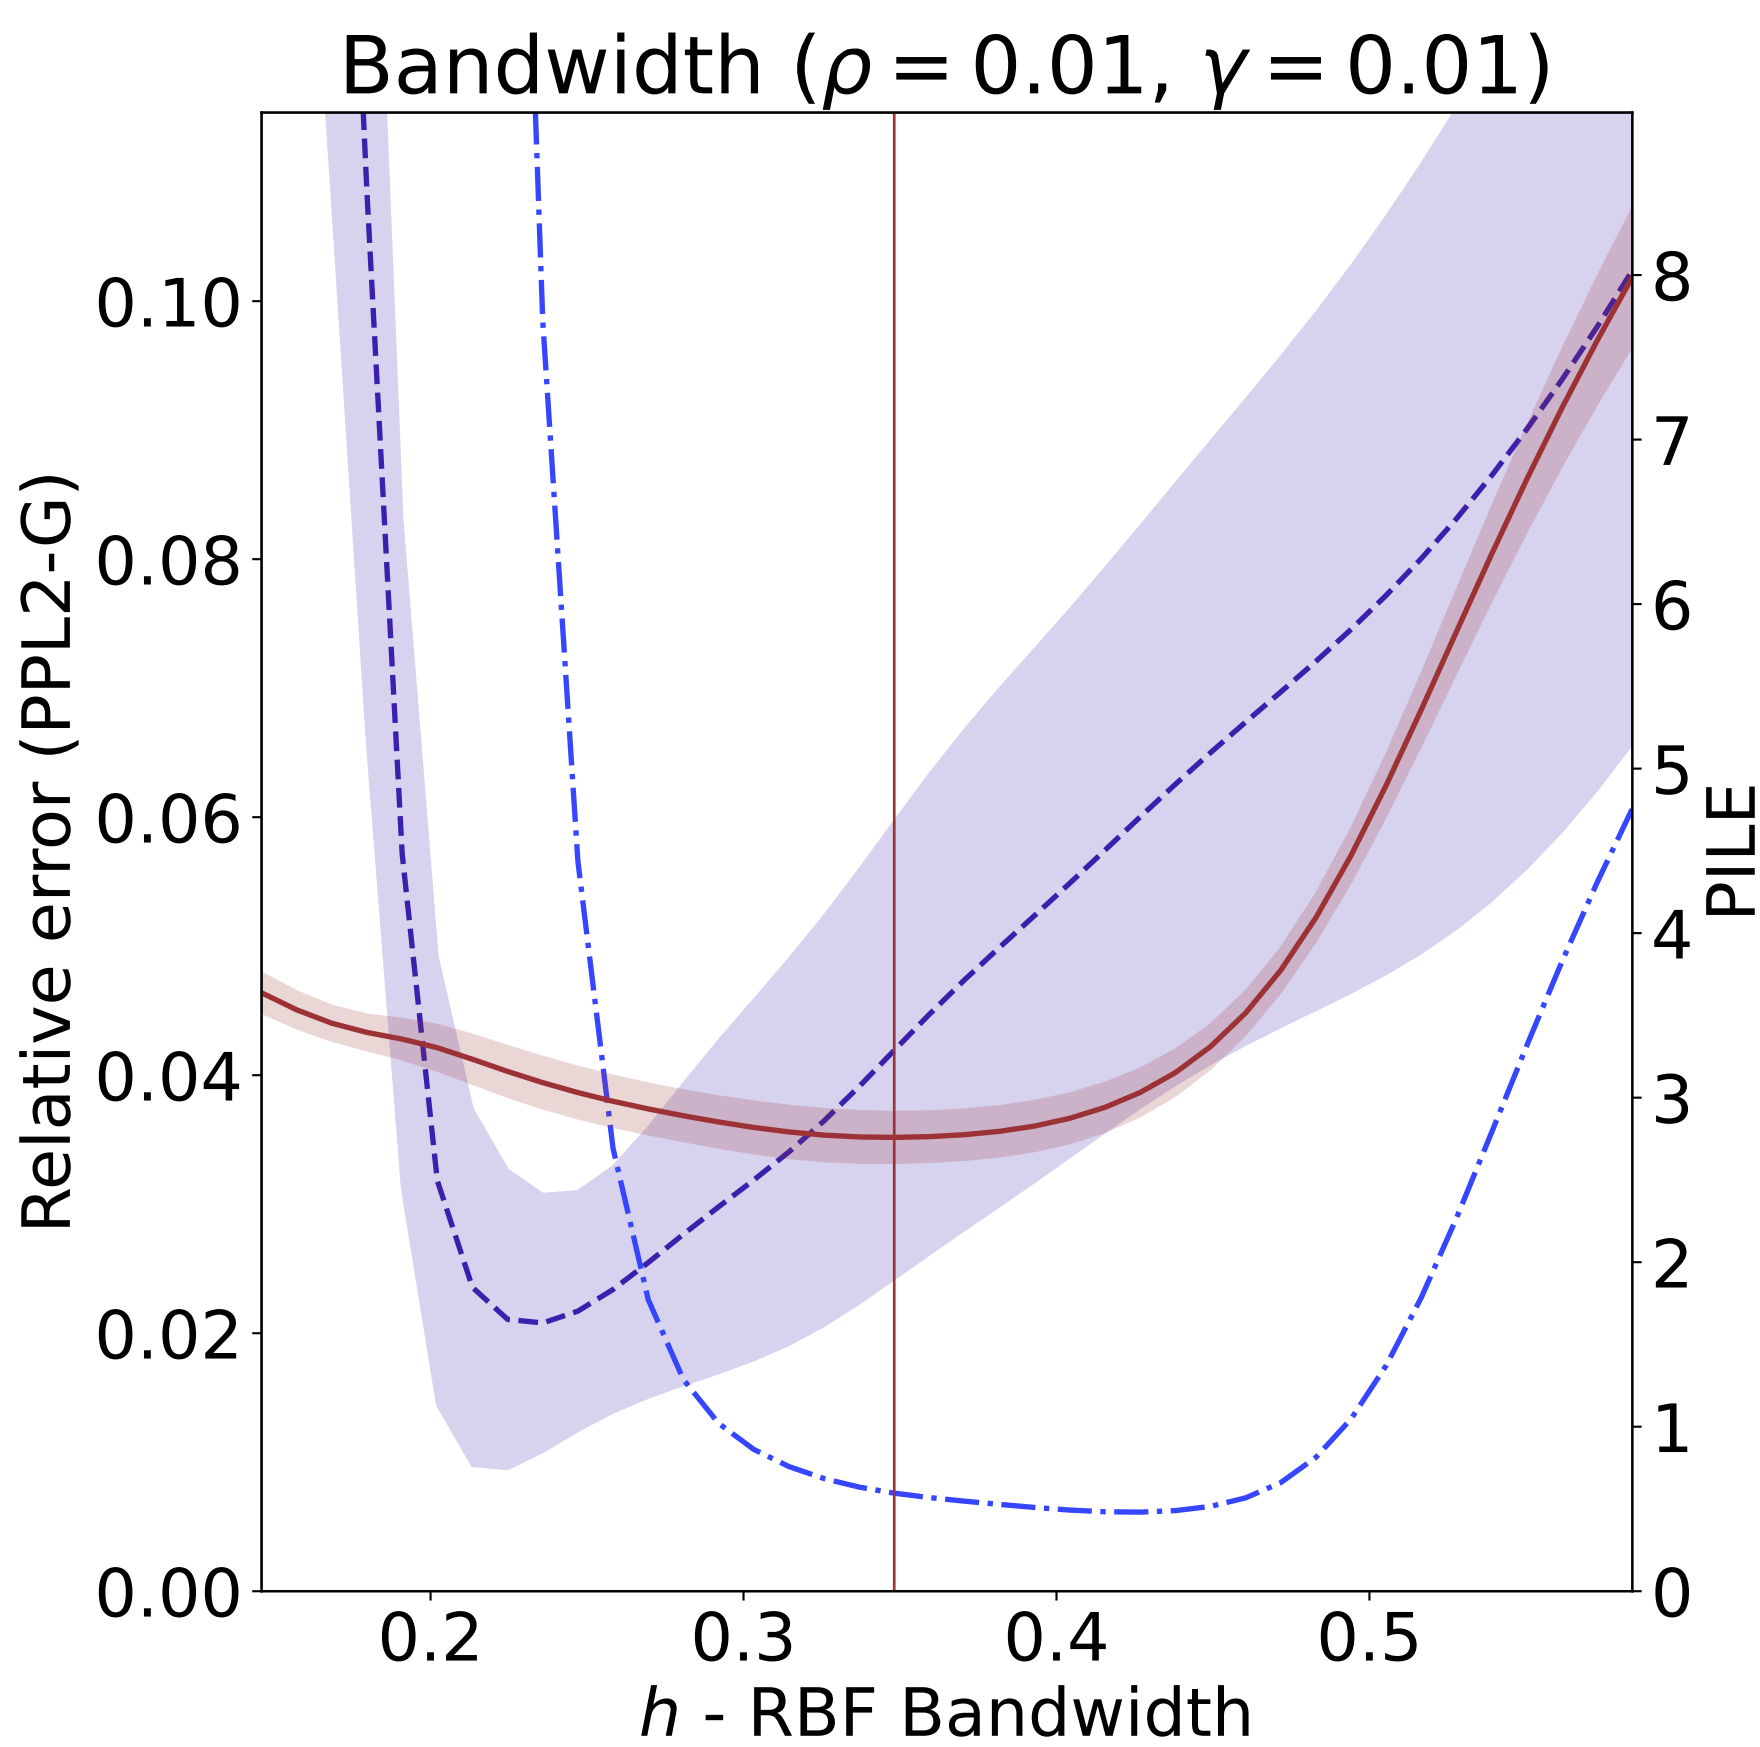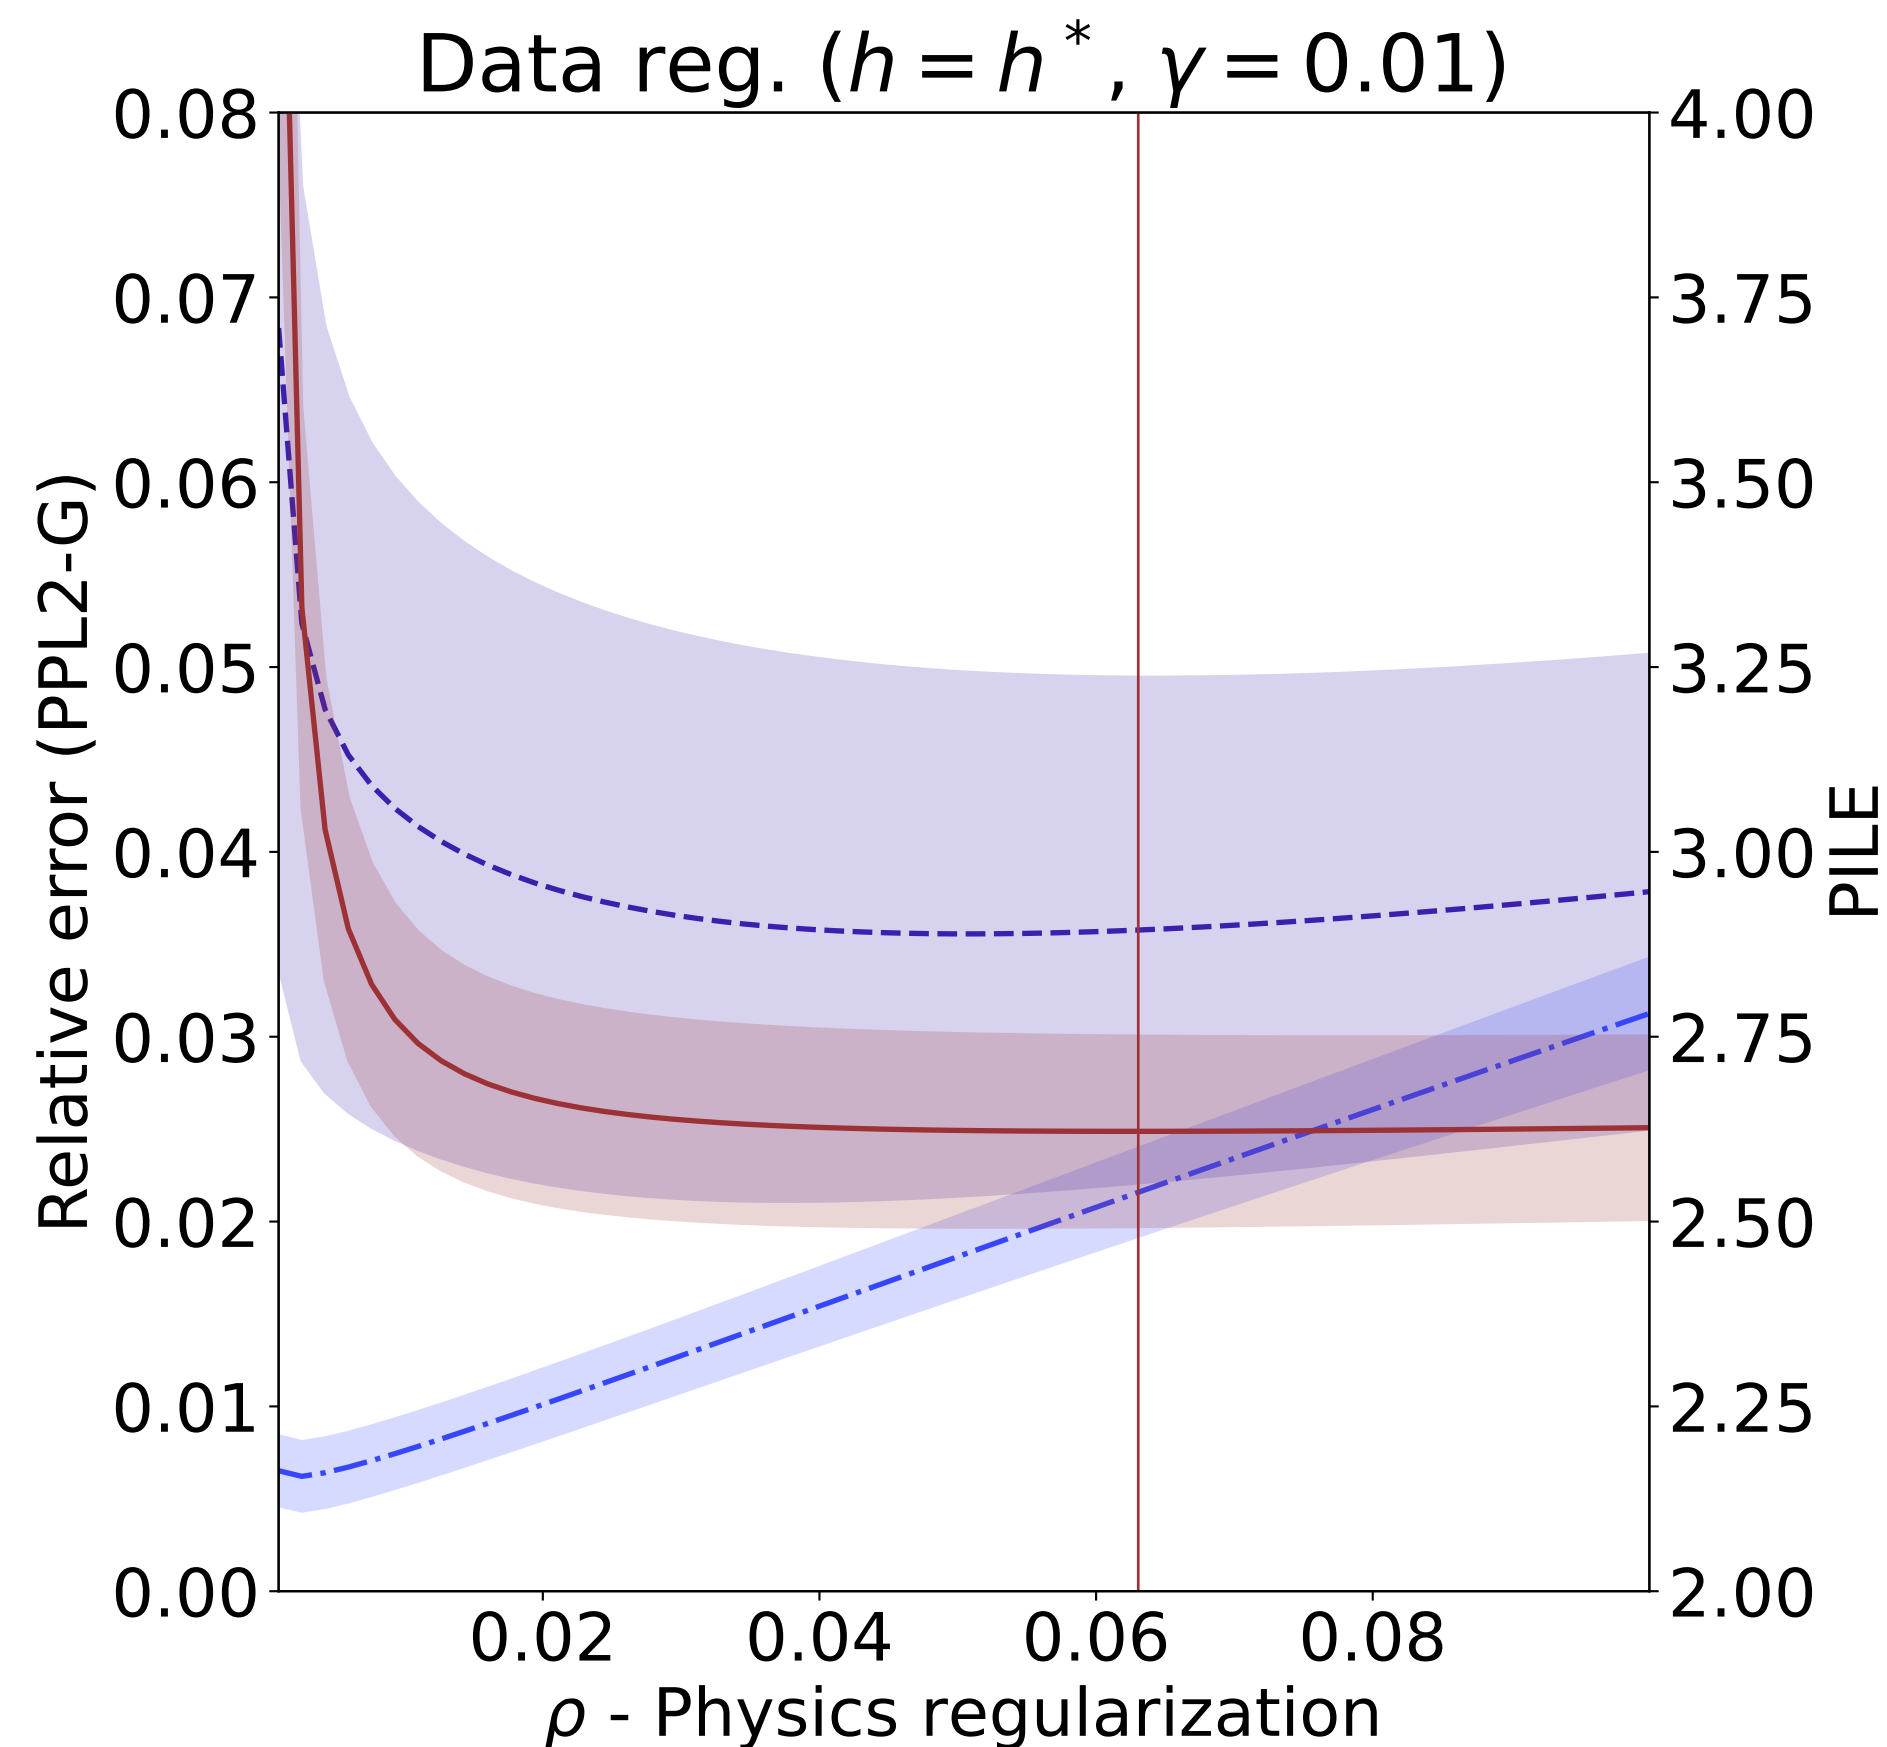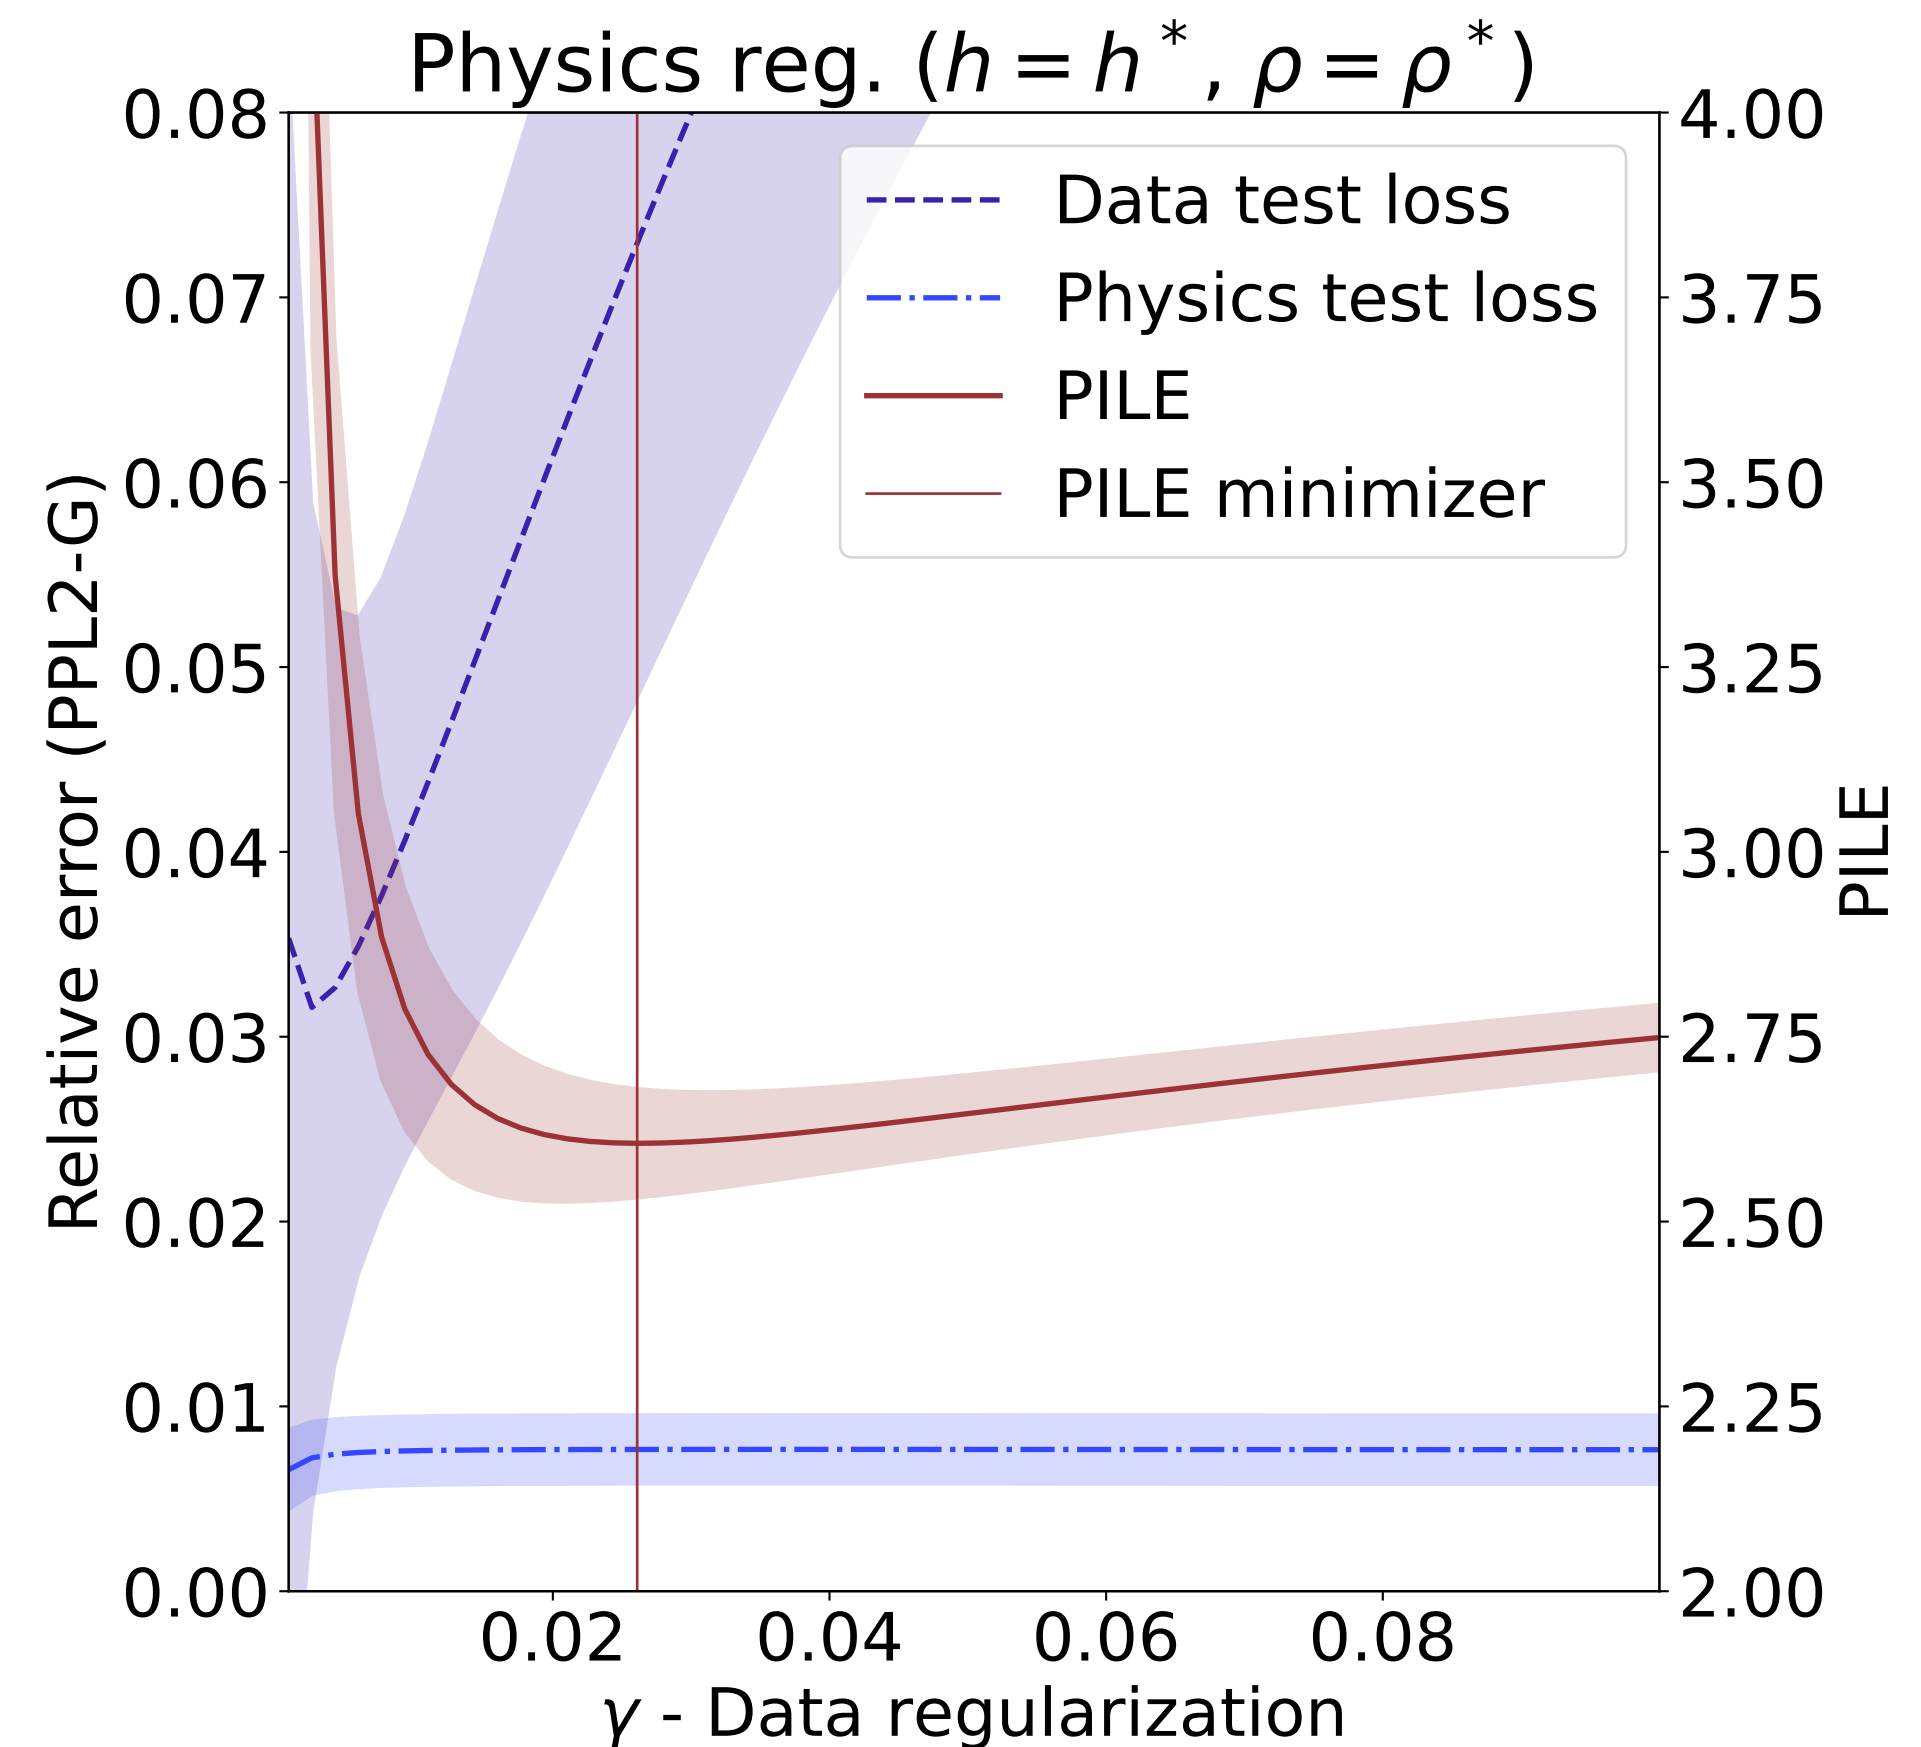

Supplement: supplementary_material [file PILE-Guided-Hyperparameter-Selection-ebs.pdf › iclr-pile/PILE-Guided-Hyperparameter-Selection-ebs.pdf]

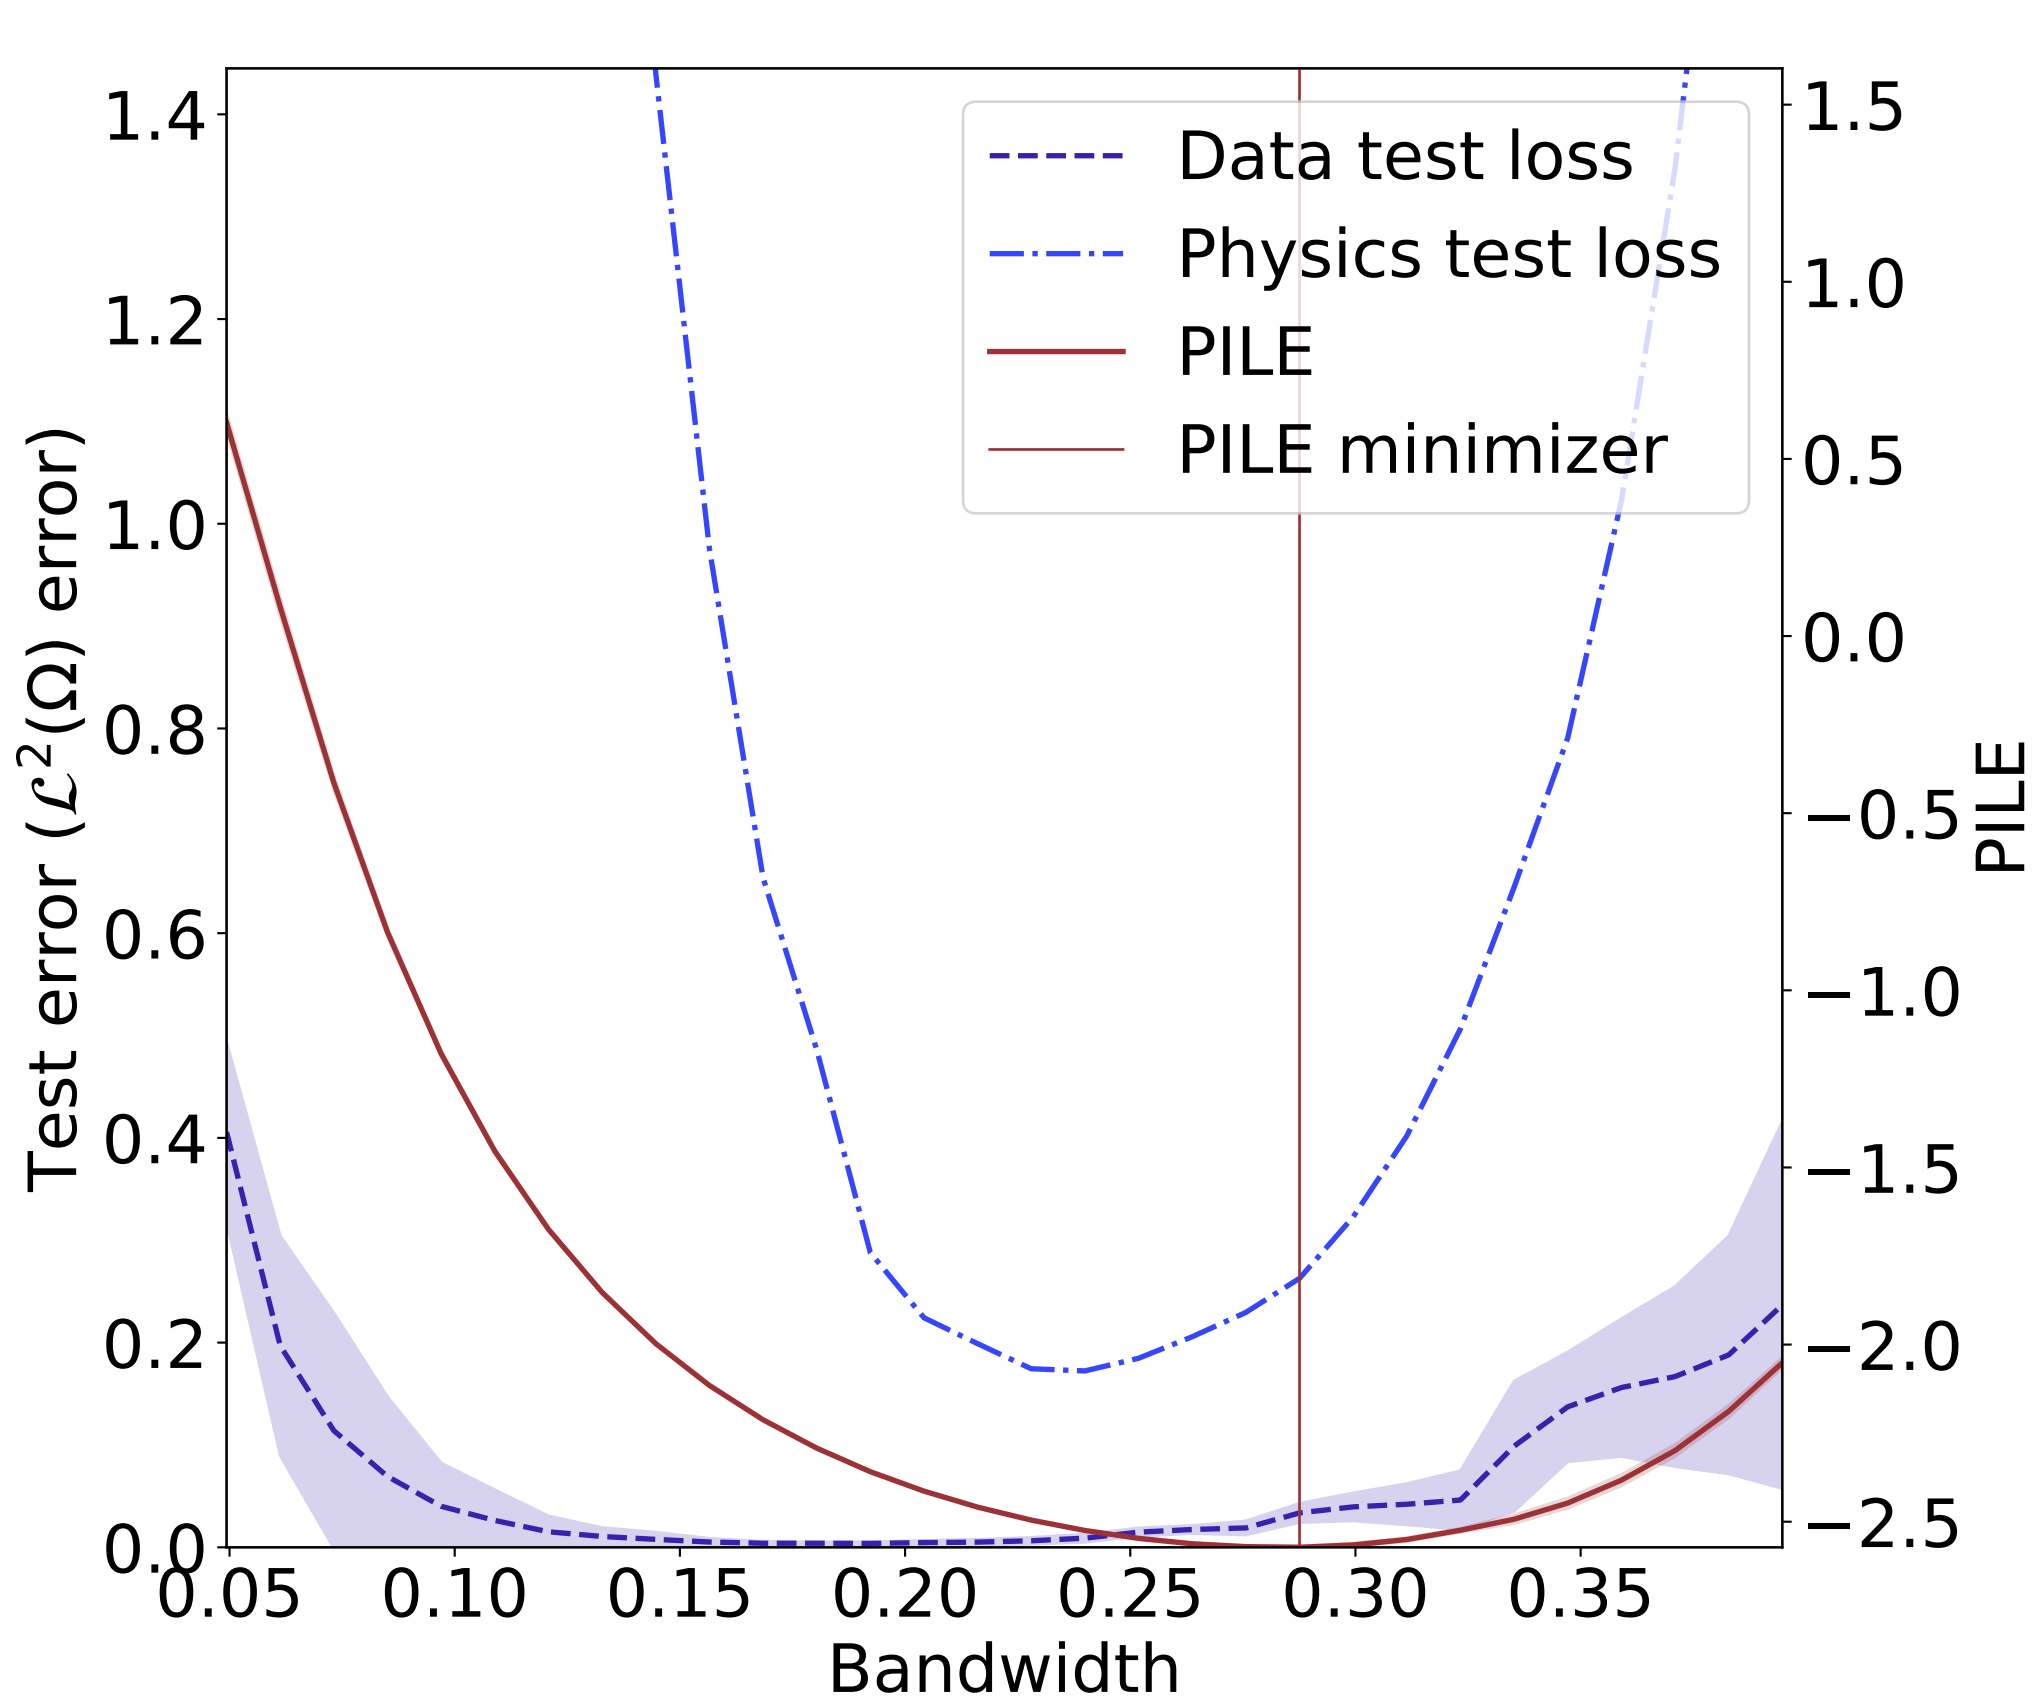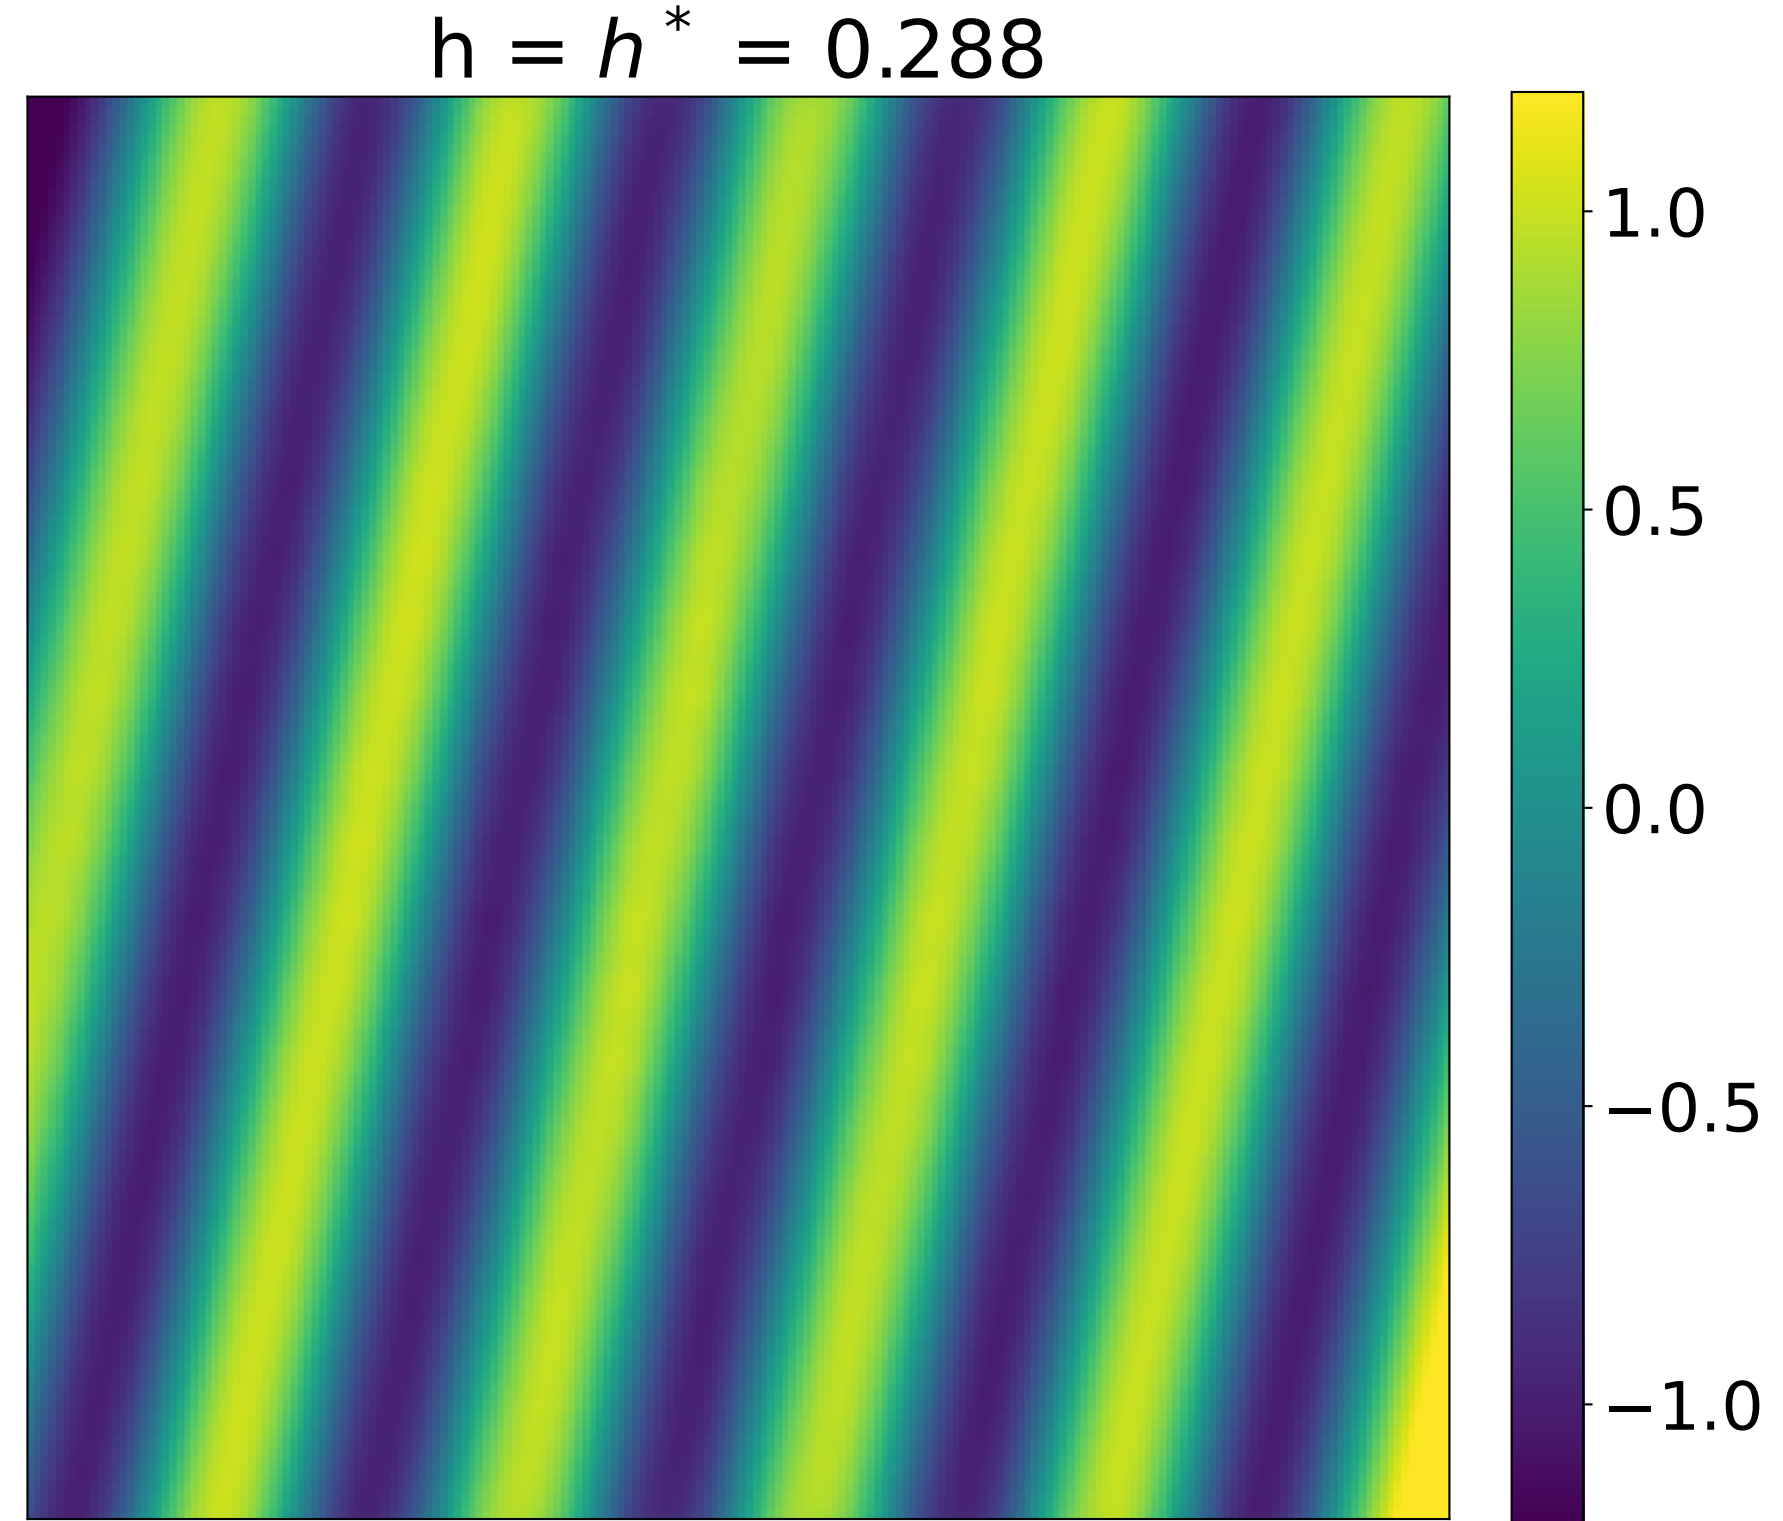

Supplement: supplementary_material [file aniso-rbf-convection.pdf › iclr-pile/aniso-rbf-convection.pdf]

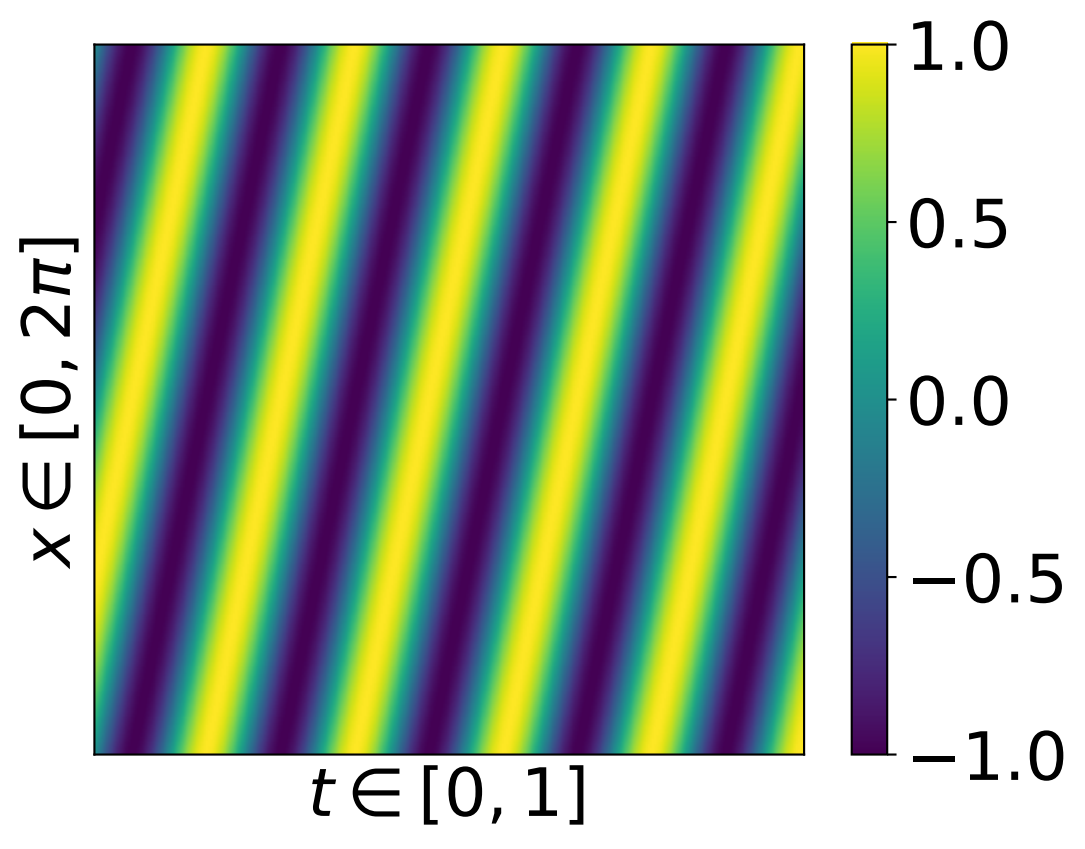

Supplement: supplementary_material [file convection.pdf › iclr-pile/convection.pdf]

$$\theta^* = 1.41, s^* = 0.50$$

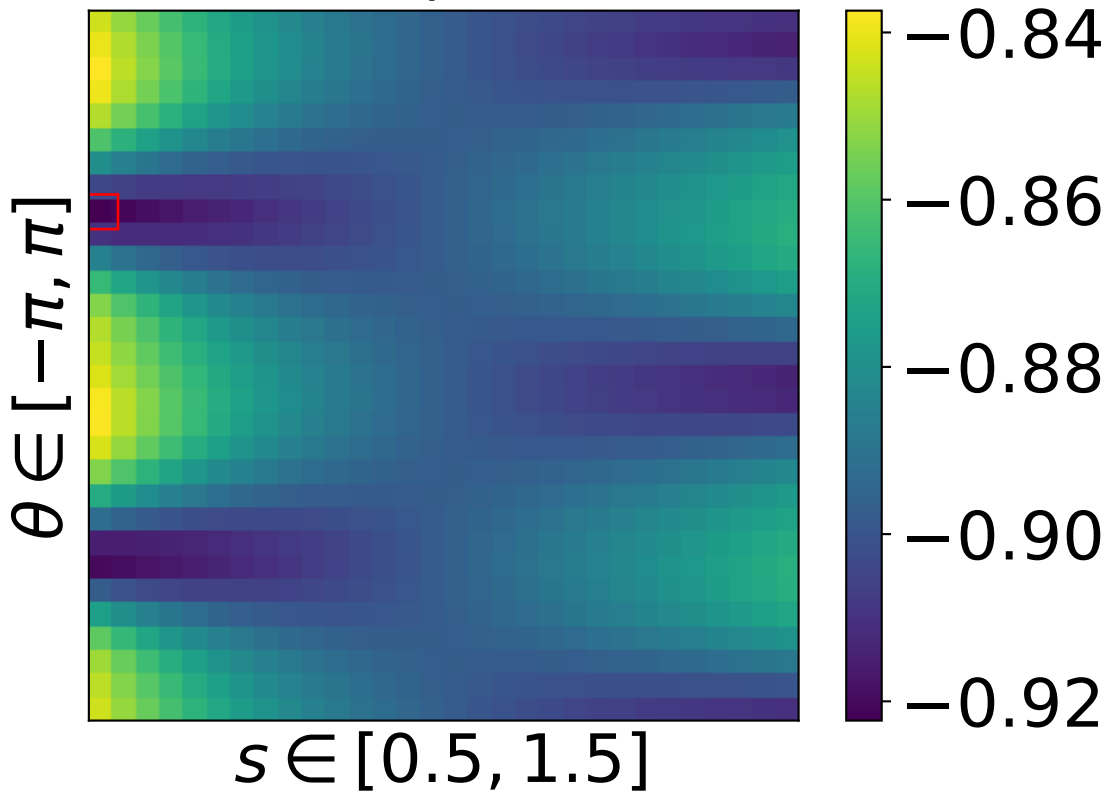

Supplement: supplementary_material [file fredholm-optimization.pdf › iclr-pile/fredholm-optimization.pdf]

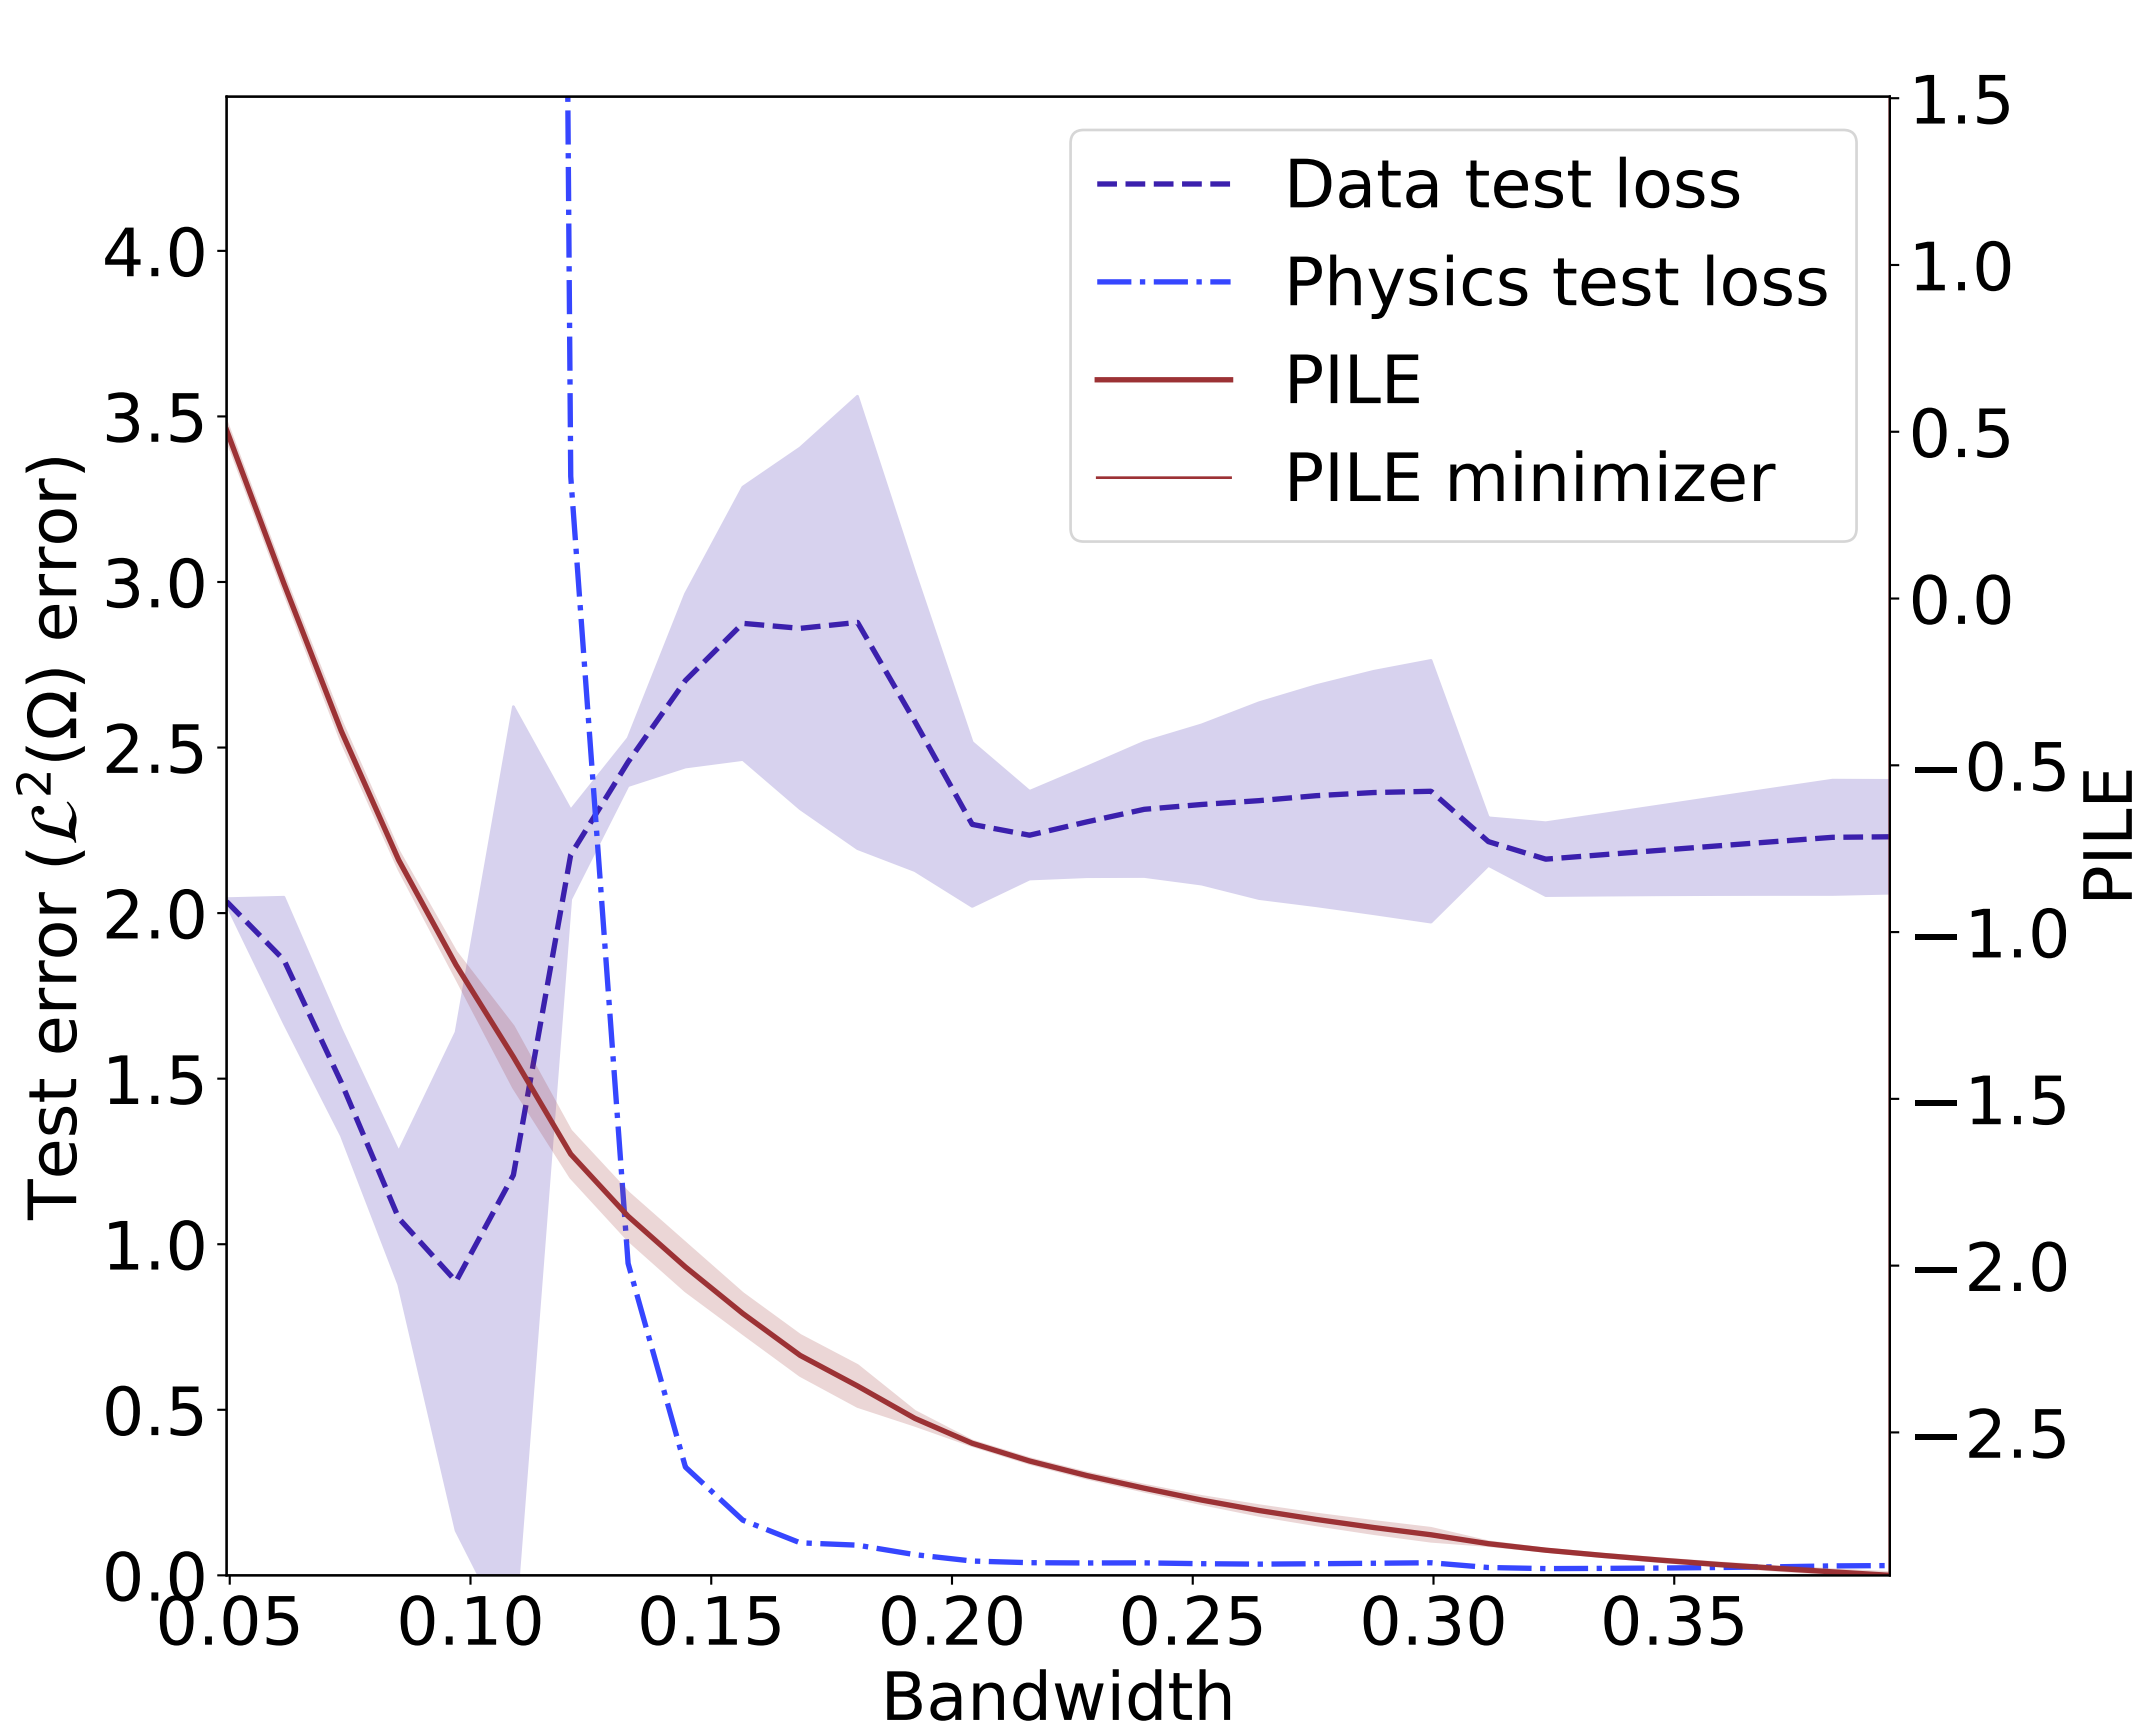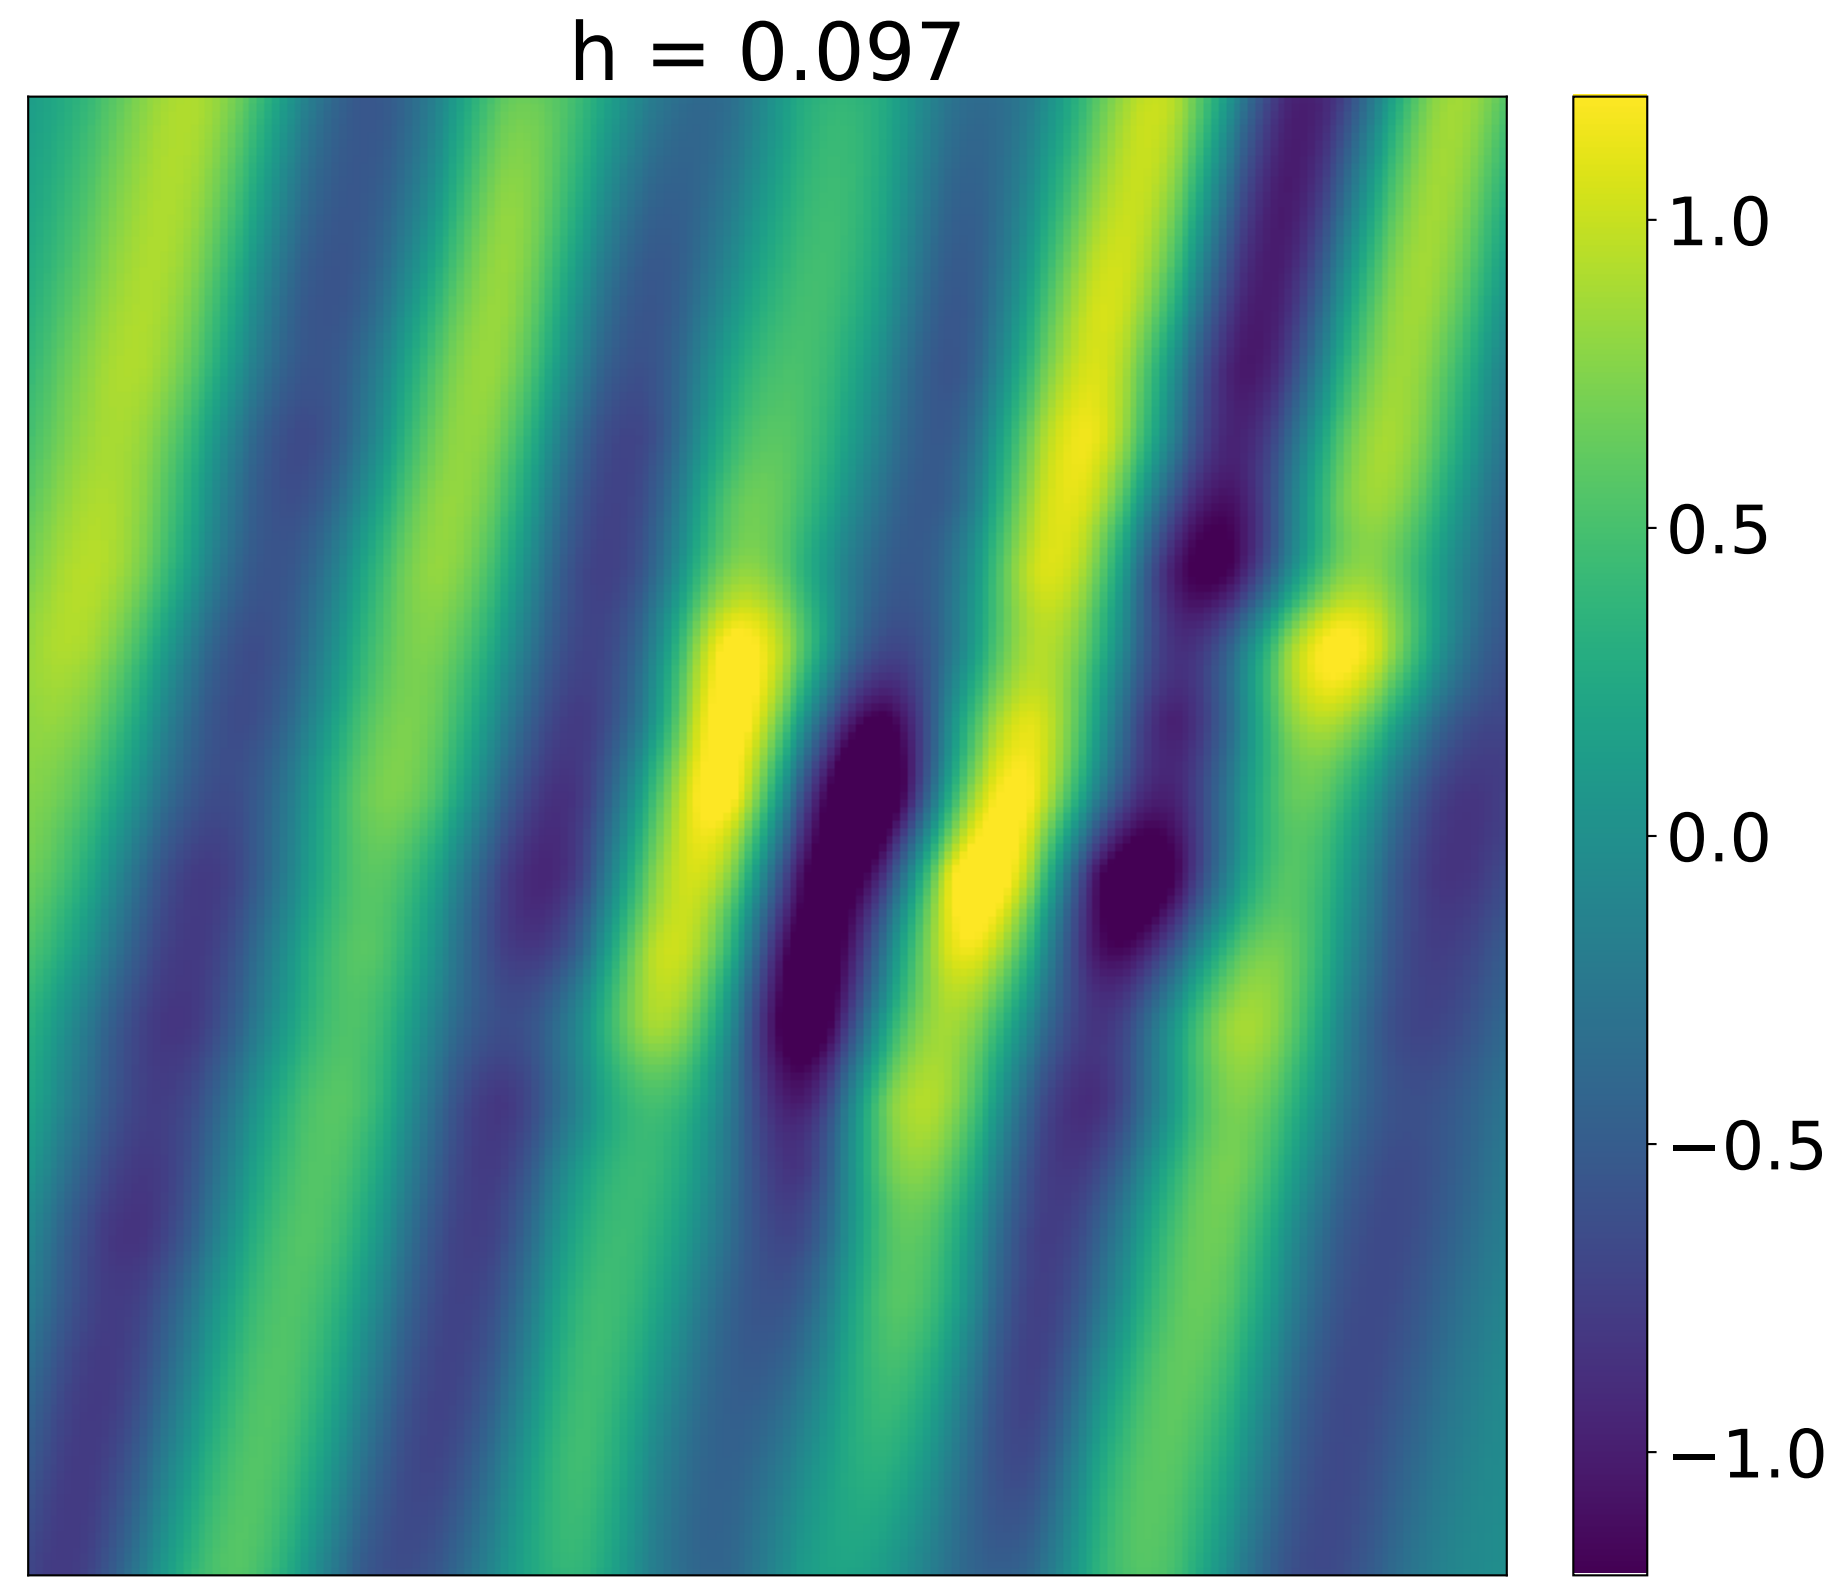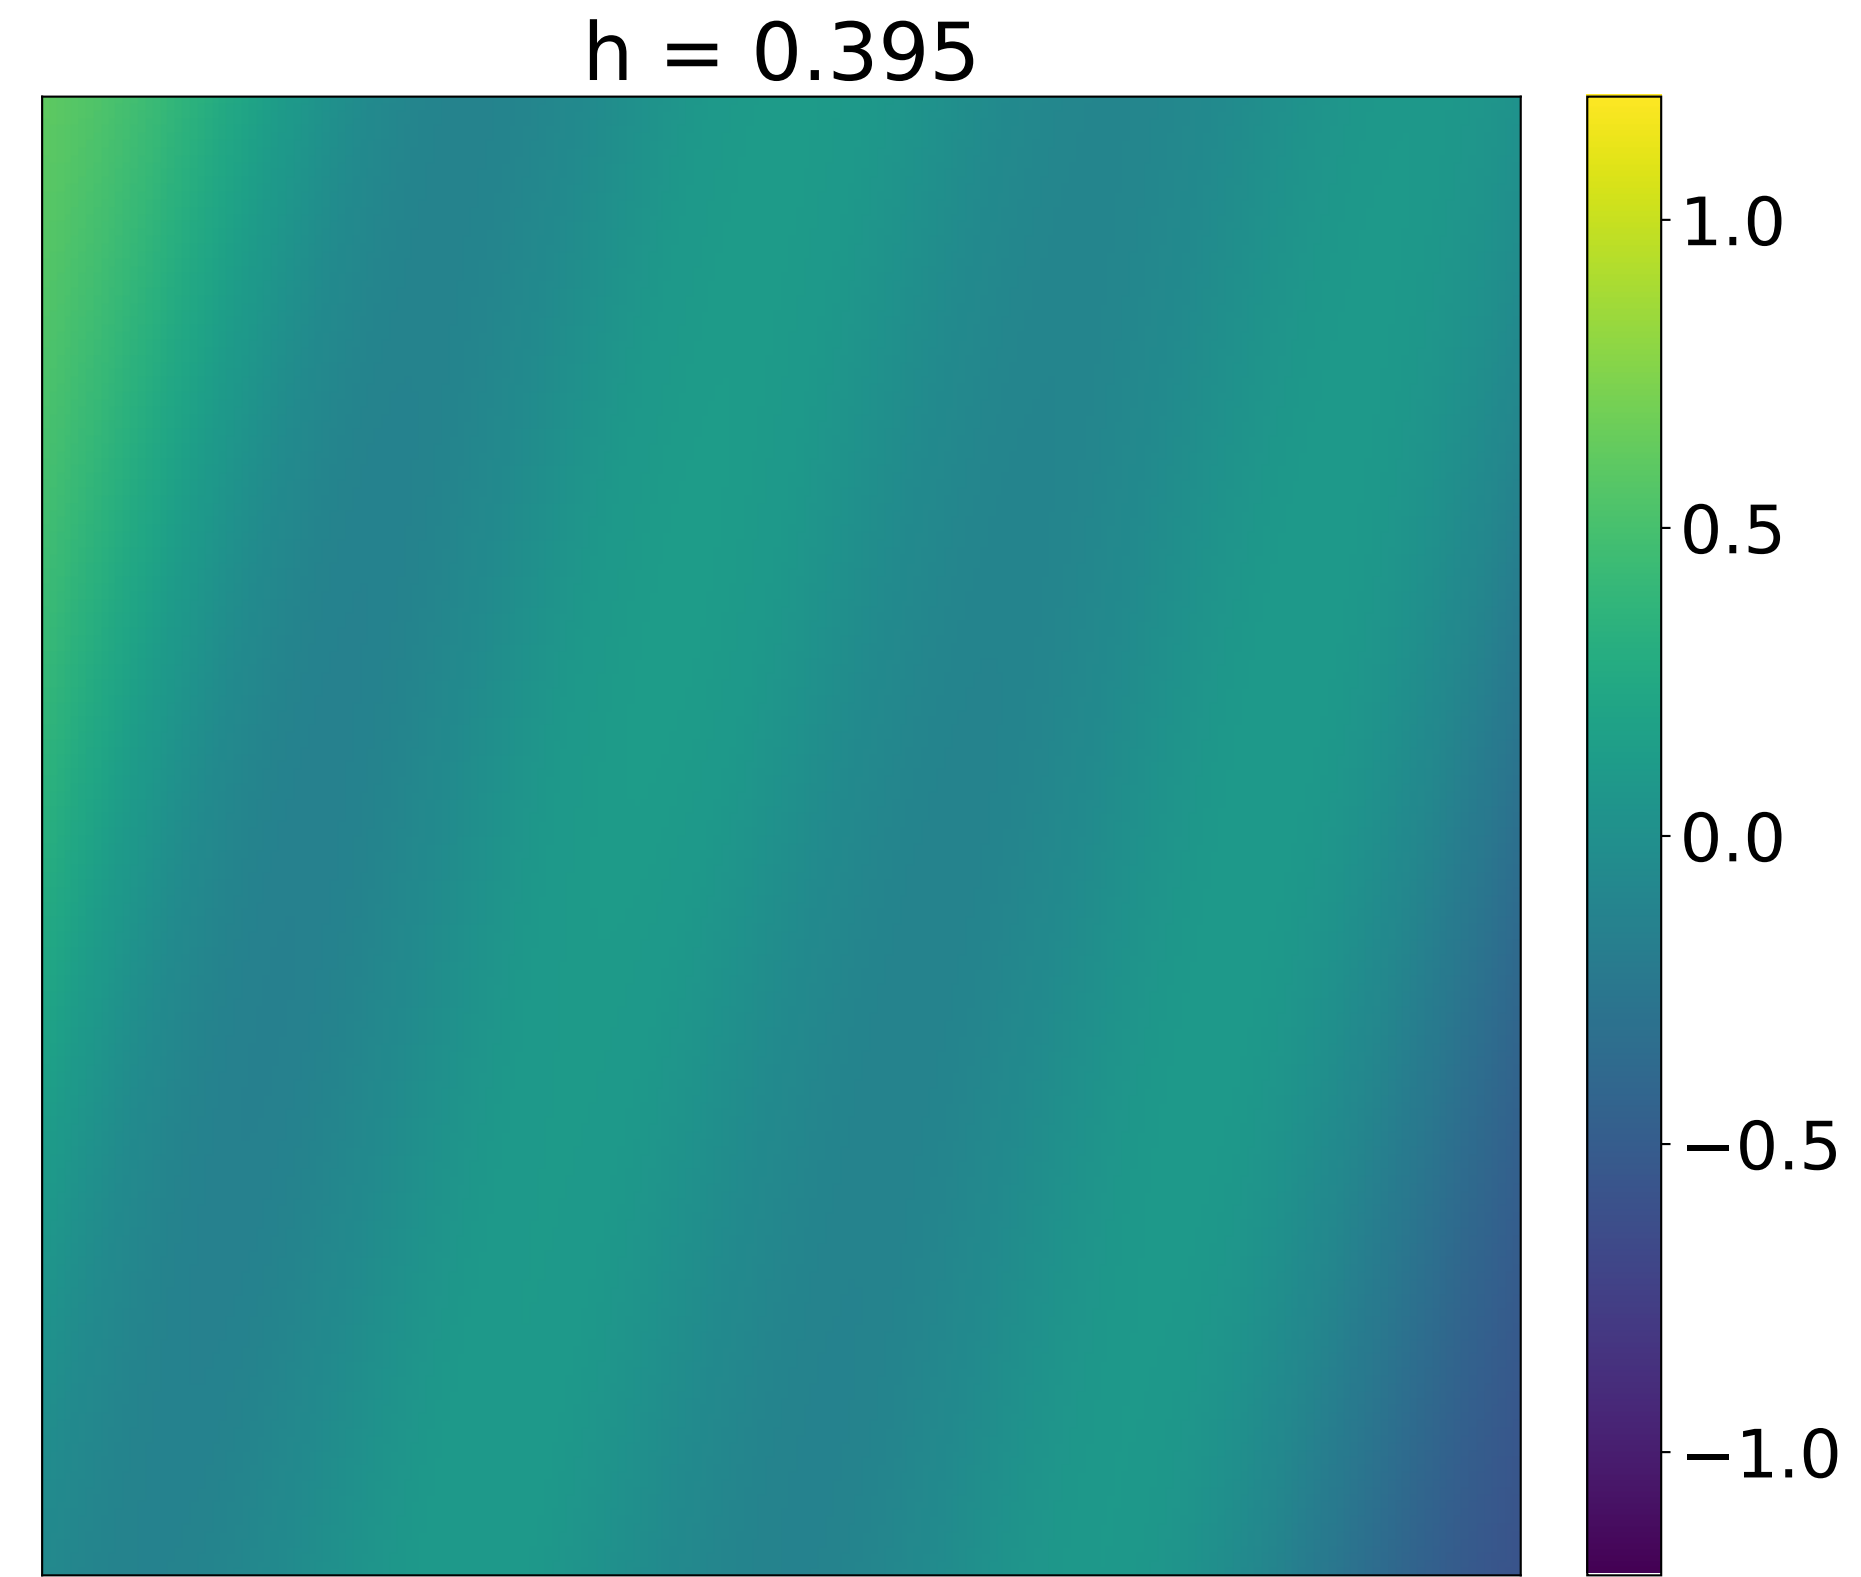

Supplement: supplementary_material [file pathological-rbf-convection.pdf › iclr-pile/pathological-rbf-convection.pdf]
